# Supplementary material for: Acylmethyl(aryl)tellurium(iv,ii) derivatives: intramolecular secondary bonding and steric rigidity
Source: Royal Society of Chemistry journal article supplement (doi:10.1039/b800473k), 2008-01-01
Supplement: b800473k.pdf [file b800473k.pdf]

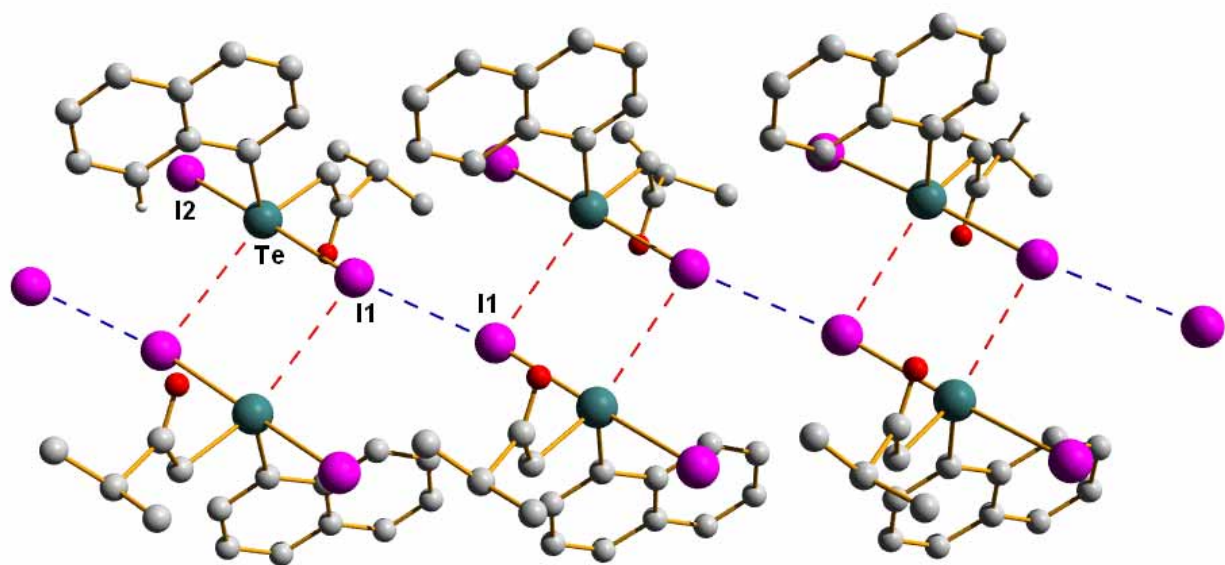

**Figure S1.** 1-D Supramolecular motif via Te...I and I...I interactions in the lattices of **1Ac**.

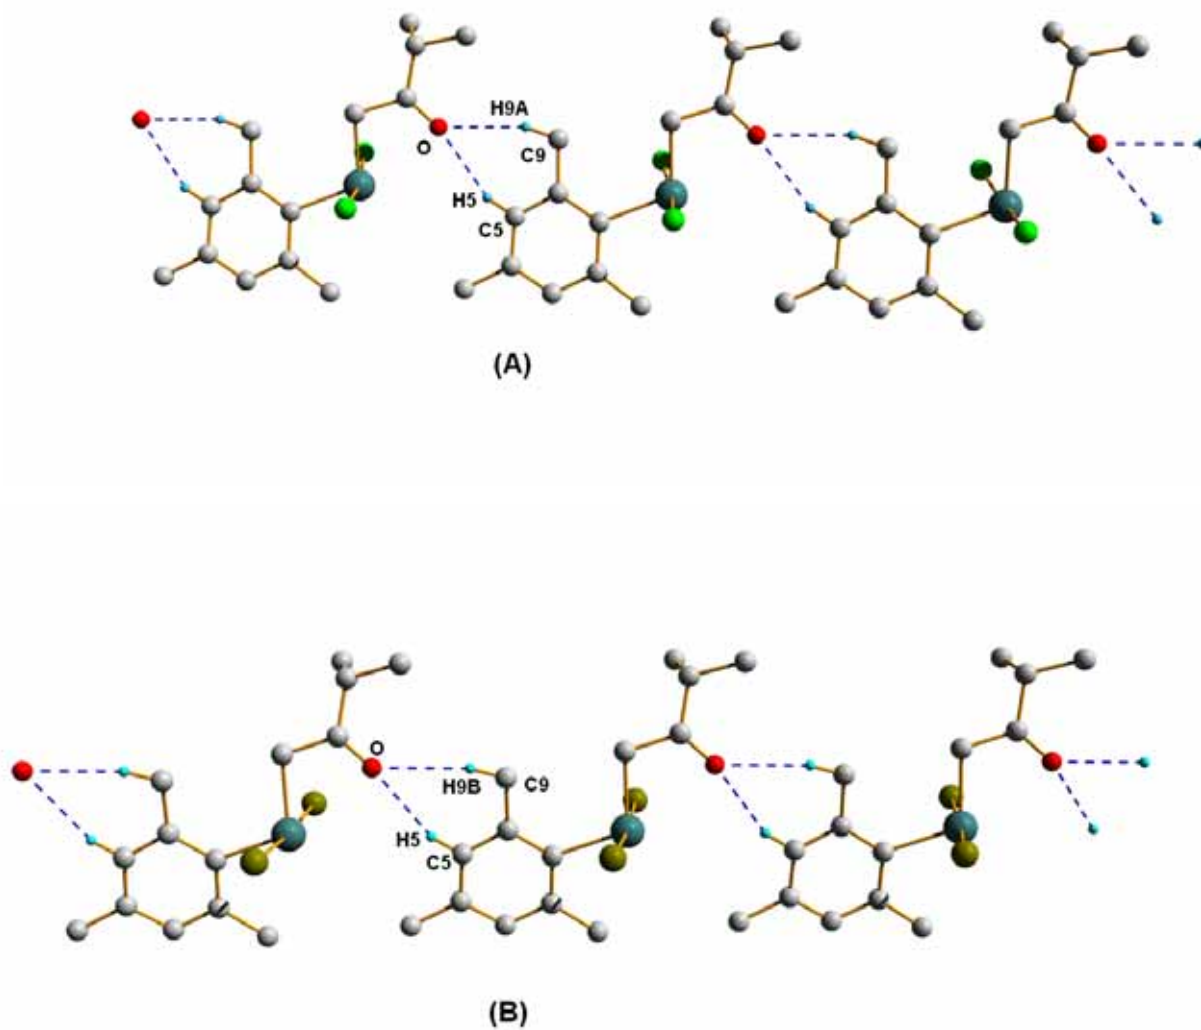

**Figure S2.** 1-D Supramolecular motif via C—H...O H-Bonds in the lattices of **1Ba** (A) and **1Bb** (B). Only relevant H atoms are shown for clarity.

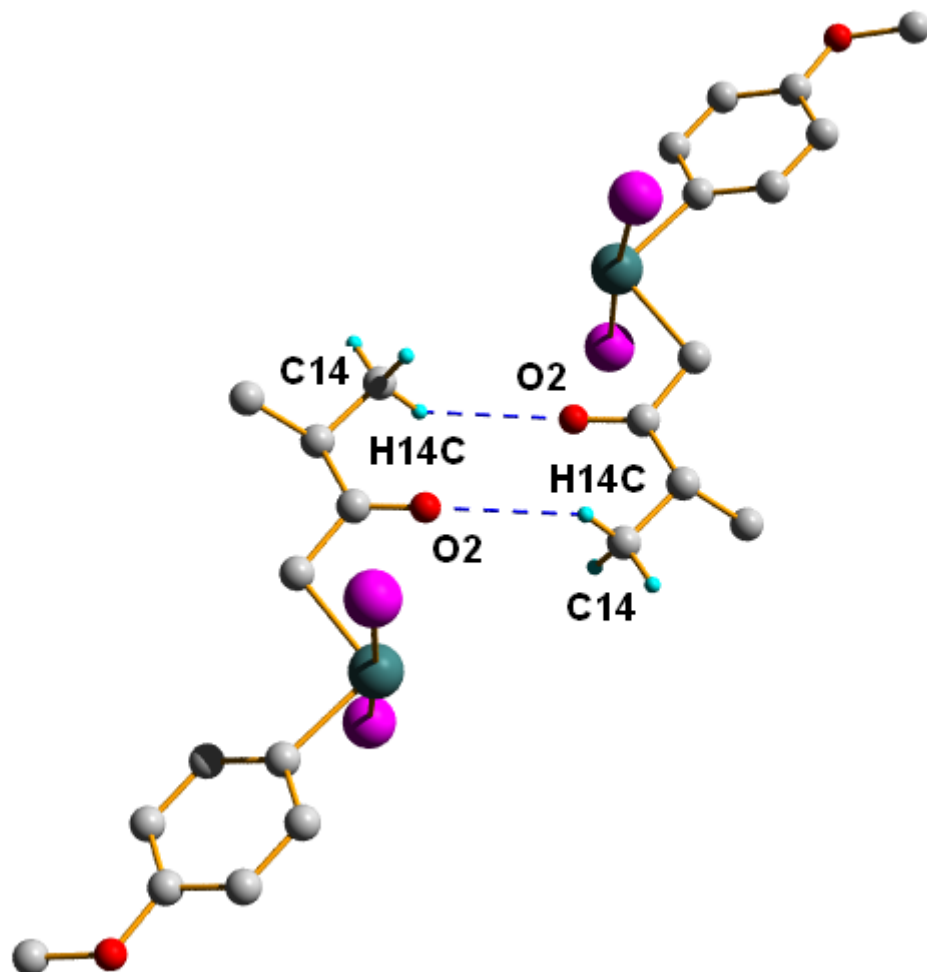

**Figure S3.** Centrosymmetric pair of **1Cc** molecules realized by means of a supramolecular synthon provided by isopropyl fragments.

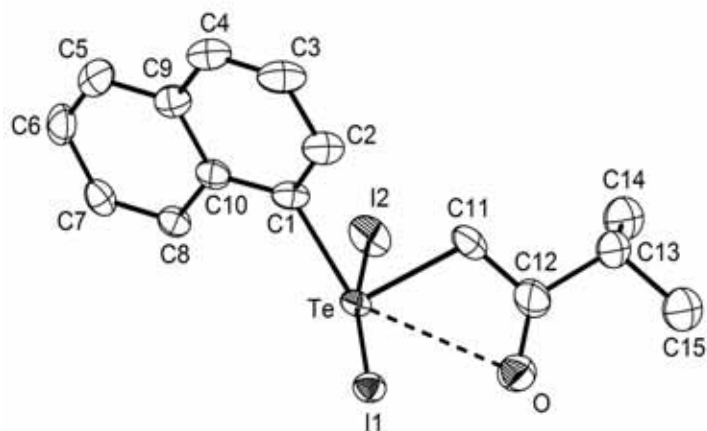

**Figure S4.** Molecular structure of **1Ac** showing 50% probability displacement ellipsoids and the atom numbering scheme. Hydrogen atoms are omitted for clarity. Selected bond distances (Å) and angles (°): Te—C1 = 2.131(5), Te—C11 = 2.141(5), Te—I1 = 2.8951(5), Te—I2 = 2.9499(4), Te···O = 2.958(4); C1—Te—C11 = 93.5(2), I1—Te—I2 = 169.01(2).

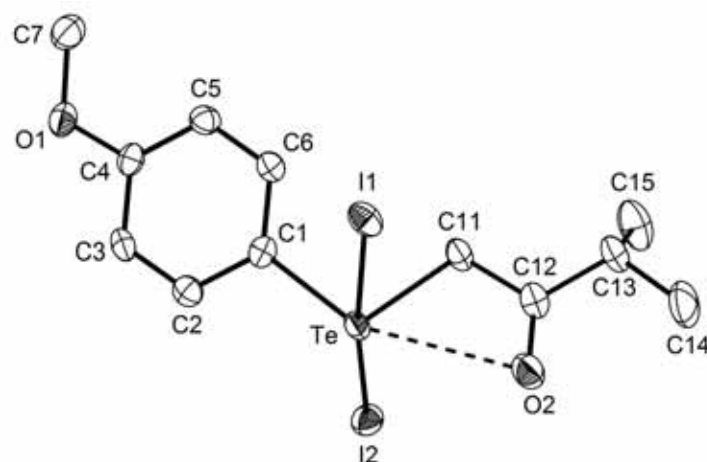

**Figure S5.** Molecular structure of **1Cc** showing 50% probability displacement ellipsoids and the atom numbering scheme. Hydrogen atoms are omitted for clarity. Selected bond distances (Å) and angles (°): Te—C1 = 2.103(4), Te—C11 = 2.129(4), Te—I1 = 2.9513(4), Te—I2 = 2.8690(4), Te···O = 2.874(3); C1—Te—C11 = 98.4(2), I1—Te—I2 = 173.26(1).

**Table S1.** Bond parameters for D—H...A interactions<sup>a</sup>

|            | D—H...A                          | d(D—H) (Å) | d(H...A) (Å) | d(D...A) (Å) | <(DHA) (°) |
|------------|----------------------------------|------------|--------------|--------------|------------|
| <b>1Aa</b> | C4A—H4A... OA <sup>i</sup>       | 0.95       | 2.611        | 3.448        | 147.3      |
|            | C5A—H5A... OA <sup>i</sup>       | 0.95       | 2.688        | 3.505        | 144.4      |
| <b>1Ac</b> | C3—H3... O <sup>ii</sup>         | 0.95       | 2.561        | 3.397        | 146.9      |
| <b>1Ba</b> | C5—H5...O <sup>iii</sup>         | 0.95       | 2.499        | 3.402        | 158.9      |
|            | C9—H9A...O <sup>iii</sup>        | 0.98       | 2.656        | 3.577        | 156.7      |
|            | C3—H3...Cl1 <sup>iv</sup>        | 0.95       | 2.904        | 3.741        | 147.6      |
| <b>1Bb</b> | C5—H5...O <sup>v</sup>           | 0.95       | 2.567        | 3.449        | 154.8      |
|            | C9—H9B...O <sup>v</sup>          | 0.98       | 2.519        | 3.472        | 163.9      |
|            | C7—H7A...Br1 <sup>vi</sup>       | 0.98       | 3.124        | 3.650        | 115.1      |
|            | C14—H14C...Br2 <sup>vii</sup>    | 0.98       | 3.147        | 4.093        | 162.6      |
| <b>1Ca</b> | C2A—H2A...O2A <sup>viii</sup>    | 0.95       | 2.733        | 3.550        | 144.6      |
|            | C7B—H7B1... O2A <sup>viii</sup>  | 0.98       | 2.547        | 3.350        | 139.2      |
|            | C2B—H2B...O2B <sup>ix</sup>      | 0.95       | 2.635        | 3.395        | 137.2      |
|            | C14A—H14A... O2B <sup>x</sup>    | 0.98       | 2.768        | 3.642        | 148.8      |
|            | C2B—H2B...C11B <sup>xi</sup>     | 0.95       | 2.921        | 3.463        | 117.4      |
|            | C5B—H5B...C12A <sup>xii</sup>    | 0.95       | 2.937        | 3.864        | 165.1      |
|            | C11B—H11C...C11A <sup>iii</sup>  | 0.99       | 2.839        | 3.816        | 169.1      |
|            | C11B—H11D...C11B <sup>xiii</sup> | 0.99       | 2.874        | 3.646        | 135.4      |
| <b>1Cc</b> | C14B—H14F...C11A <sup>iii</sup>  | 0.98       | 2.930        | 3.805        | 149.2      |
|            | C14—H14C...O2 <sup>iv</sup>      | 0.98       | 2.678        | 3.498        | 141.5      |
|            | C7—H7B...O1 <sup>xiv</sup>       | 0.98       | 2.700        | 3.380        | 127.0      |
|            | C2—H2...I2 <sup>xiv</sup>        | 0.95       | 3.153        | 4.020        | 152.6      |
|            | C7—H7A...I2 <sup>xv</sup>        | 0.98       | 3.159        | 3.912        | 134.7      |
|            | C11—H11A...I1 <sup>xvi</sup>     | 0.99       | 3.068        | 4.005        | 158.4      |
|            | C11—H11B...I1 <sup>xvii</sup>    | 0.99       | 3.151        | 3.995        | 144.1      |

<sup>a</sup> Symmetry operations used to generate equivalent atoms: (i) 1.5-x, y, 1.5+z; (ii) 1.5+x, 1.5-y, 1.5+z; (iii) 1+x, y, z; (iv) 2-x, -y, -z; (v) -1+x, y, z; (vi) -x, -1.5+y, 1.5-z; (vii) -x, 1-y, -z; (viii) -1.5+x, 1.5-y, 2-z; (ix) -1.5+x, 1.5-y, 2-z; (x) 1-x, 1.5+y, 1.5-z; (xi) -1.5+x, 1.5-y, 2-z; (xii) ½+x, 1.5-y, 2-z; (xiii) 1.5+x, 1.5-y, 2-z; (xiv) x, 1.5-y, 1.5+z; (xv) -1.5+x, 1.5-y, -½+z; (xvi) x, y, 1+z; (xvii) 1-x, -y, -z;.
